# Supplementary material for: Bioinformatic Analysis of the Nicotinamide Binding Site in Poly(ADP-Ribose) Polymerase Family Proteins
Source: PubMed Central journal article supplement (PMC8002165; doi:10.3390/cancers13061201), 2021-03-10
Supplement: cancers-13-01201-s001.pdf [file cancers-13-01201-s001.pdf]

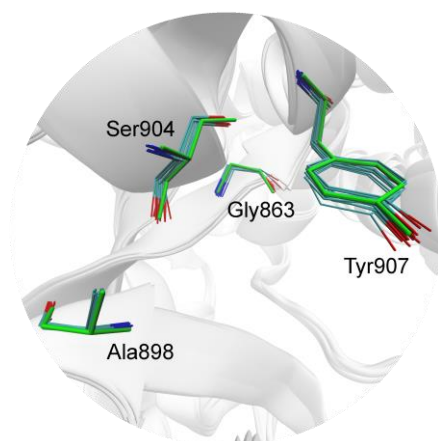

**Figure S1.** Cluster of similar conformations of the NA binding site in PARP-1 crystal structures. The selected representative structure of PARP-1 (PDB ID 4zzz, 1.9 Å resolution) is shown in green.

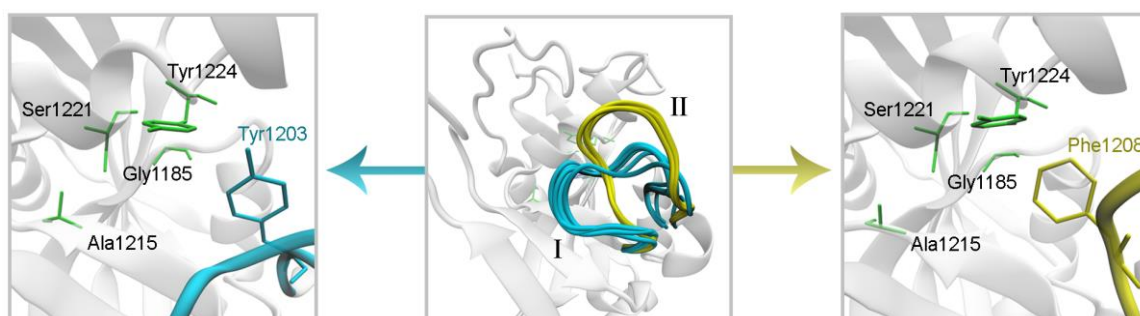

**Figure S2.** Two possible conformations of the D-loop in crystal structures of PARP-5a. Conformation I is shown in blue, conformation II in yellow.

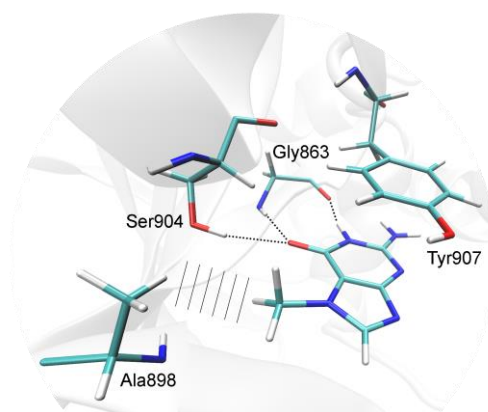

**Figure S3.** Interactions of 7-MG in the NA binding site of PARP-1 revealed by molecular modeling: hydrogen bonds with Gly863 and Ser904, hydrophobic contact with Ala898, and  $\pi$ -stacking with Tyr907.

**Table S1.** Crystal structures of PARPs used in the analysis of the NA binding site architecture. The selected representative structures are marked in gray, structures excluded as outliers/minor conformations are indicated with a strikethrough.

| PARP | Available PDB Structures                                                                                                                                                                                                                                                                                                                                                                                                                                                                                                                                                                                                                                                                                                                                                                                                                                                                                                                                                                                                                                                                                                                                                                                                                                               |
|------|------------------------------------------------------------------------------------------------------------------------------------------------------------------------------------------------------------------------------------------------------------------------------------------------------------------------------------------------------------------------------------------------------------------------------------------------------------------------------------------------------------------------------------------------------------------------------------------------------------------------------------------------------------------------------------------------------------------------------------------------------------------------------------------------------------------------------------------------------------------------------------------------------------------------------------------------------------------------------------------------------------------------------------------------------------------------------------------------------------------------------------------------------------------------------------------------------------------------------------------------------------------------|
| 1    | 1uk0, 1uk1, 1wok, <del>2n8a</del> , 2rcw, 2rd6, 3gju, 3gn7, 3l3l, 3l3m, <del>3od8</del> , <del>3oda</del> , <del>3ode</del> , <del>3ode</del> , 4av1, <del>4dgy</del> , <del>4gv7</del> , 4hhy, 4hhz, 4l6s, <del>4opx</del> , <del>4oqa</del> , <del>4oqb</del> , 4pjt, 4r5w, 4r6e, 4rv6, 4und, 4uxb, 4xhu, <del>4zzz</del> , 5a00, 5ds3, 5ha9, 5kpn, 5kpo, 5kpp, 5kppq, 5wrq, 5wry, 5wrz, 5ws0, 5ws1, 5wtc, 6bhv                                                                                                                                                                                                                                                                                                                                                                                                                                                                                                                                                                                                                                                                                                                                                                                                                                                      |
| 2    | 3kcz, 3kjd, 4pju, 4tvj, <del>4zzx</del> , 4zzy, 5d5k, 5dsy                                                                                                                                                                                                                                                                                                                                                                                                                                                                                                                                                                                                                                                                                                                                                                                                                                                                                                                                                                                                                                                                                                                                                                                                             |
| 3    | 3c49, 3c4h, 3ce0, 3fhh, 4gv0, <del>4gv2</del> , 4gv4, 4l6z, 4l70, 4l7l, 4l7n, 4l7o, 4l7p, 4l7r, 4l7u                                                                                                                                                                                                                                                                                                                                                                                                                                                                                                                                                                                                                                                                                                                                                                                                                                                                                                                                                                                                                                                                                                                                                                   |
| 5a   | <del>2rf5</del> , 3udd, 3uh2, 3uh4, <del>4dvi</del> , 4i9i, 4k4e, 4k4f, 4krs, 4li6, 4li7, 4li8, <del>4msg</del> <sup>1</sup> , 4msk, 4mt9, <del>4n3r</del> , 4n4t, 4n4v, <del>4oa7</del> , <del>4tos</del> , <del>4tor</del> , 4u6a, 4uuh, 4uw1, 4w5s, <del>4w6e</del> <sup>2</sup> , 5ebt, 5ece, 5ety                                                                                                                                                                                                                                                                                                                                                                                                                                                                                                                                                                                                                                                                                                                                                                                                                                                                                                                                                                 |
| 5b   | 3kr7, 3kr8, <del>3mhj</del> , <del>3mhk</del> , 3p0n, 3p0p, 3p0q, 3u9h, 3u9y, <del>3ua9</del> , 3w5l, 4avu, 4avw, <del>4bfp</del> , <del>4bj9</del> , <del>4bjb</del> , <del>4bje</del> , 4bs4, 4bu3, 4bu5, 4bu6, 4bu7, 4bu8, 4bu9, 4bua, 4bud, 4bue, 4buf, 4bui, 4bus, 4but, 4buu, 4buv, 4buw, 4bux, 4buy, 4hki, 4hkk, 4hkn, 4hl5, 4hlf, 4hlg, 4hll, 4hll, 4hlm, 4hml, 4hmf, 4iue, 4j1z, 4j21, 4j22, 4j3l, 4j3m, 4kzl, 4kzq, 4kzu, 4l09, 4l0b, 4l0i, 4l0s, 4l0t, 4l0v, 4l10, 4l2f, 4l2g, 4l2k, 4l31, 4l32, 4l33, 4l34, 4m7b, <del>4pml</del> , <del>4pnl</del> , <del>4pnm</del> , <del>4pnn</del> , <del>4pna</del> , <del>4pnq</del> , <del>4pnr</del> , <del>4pns</del> , <del>4pnt</del> , <del>4tju</del> , <del>4tjw</del> , <del>4tjy</del> , <del>4tk0</del> , <del>4tk5</del> , <del>4tkf</del> , <del>4tkg</del> , <del>4tki</del> , 4ufu, 4ufy, 4uhg, 4ui3, 4ui4, 4ui5, 4ui6, 4ui7, 4ui8, 4uvl, 4uvm, 4uvo, 4uvm, 4uvs, 4uvt, 4uvu, 4uvv, 4uvw, 4uvx, 4uvy, 4uvz, 4ux4, 4w5i, <del>5ade</del> , <del>5adr</del> , <del>5ads</del> , <del>5adt</del> , <del>5aeh</del> , 5aku, 5akw, 5al1, 5al2, 5al3, 5al4, 5al5, 5c5p, 5c5q, 5c5r, 5dcz, 5fpf, 5fpg, <del>5nob</del> , 5nsp, 5nsx, 5nt0, 5nt4, 5nut, 5nvc, 5nve, 5nvf, 5nvh, 5nwd, <del>5nwg</del> , 5nxe |
| 10   | 3hkv, <del>5lx6</del>                                                                                                                                                                                                                                                                                                                                                                                                                                                                                                                                                                                                                                                                                                                                                                                                                                                                                                                                                                                                                                                                                                                                                                                                                                                  |
| 12   | <del>2pqf</del>                                                                                                                                                                                                                                                                                                                                                                                                                                                                                                                                                                                                                                                                                                                                                                                                                                                                                                                                                                                                                                                                                                                                                                                                                                                        |
| 13   | <del>2x5y</del> , 4x52                                                                                                                                                                                                                                                                                                                                                                                                                                                                                                                                                                                                                                                                                                                                                                                                                                                                                                                                                                                                                                                                                                                                                                                                                                                 |
| 14   | <del>3gey</del> , 3se2, <del>3smi</del> , <del>3smj</del> , 4f1l, 4f1q, 4py4, 5lpx, 5lyh, 5nqe, 5v7t, <del>5v7w</del>                                                                                                                                                                                                                                                                                                                                                                                                                                                                                                                                                                                                                                                                                                                                                                                                                                                                                                                                                                                                                                                                                                                                                  |
| 15   | 3blj, 3gey, <del>4f0e</del>                                                                                                                                                                                                                                                                                                                                                                                                                                                                                                                                                                                                                                                                                                                                                                                                                                                                                                                                                                                                                                                                                                                                                                                                                                            |
| 16   | <del>4f0d</del>                                                                                                                                                                                                                                                                                                                                                                                                                                                                                                                                                                                                                                                                                                                                                                                                                                                                                                                                                                                                                                                                                                                                                                                                                                                        |

<sup>1</sup> D-loop conformation II, <sup>2</sup> D-loop conformation I.

**Table S2.** Interactions between a probe inhibitor (7-MG) and NA site residues in PARPs 1–3, 5a, 5b, 10, and 12–16 revealed by 10-ns MD simulation. Mean values are presented with standard deviations.

| <b>PARP-1</b>                                               |  |           |
|-------------------------------------------------------------|--|-----------|
| <b>Distance, Å</b>                                          |  |           |
| 7-MG:CO:O ... Gly863:H                                      |  | 2.1 ± 0.2 |
| 7-MG:CO:O ... Ser904:OG:HG                                  |  | 1.9 ± 0.3 |
| 7-MG:NH:H ... Gly863:O                                      |  | 1.9 ± 0.1 |
| 7-MG:CH <sub>3</sub> :C ... Ala898:CB                       |  | 3.9 ± 0.3 |
| C(7-MG fused rings) ... C(Tyr907 benzene ring) <sup>1</sup> |  | 3.6 ± 0.2 |
| <b>Angle, deg</b>                                           |  |           |
| 7-MG Γ:CO:O ... Gly863:H ... Gly863:N                       |  | 160 ± 12  |
| 7-MG:CO:O ... Ser904:OG:HG ... Ser904:OG                    |  | 158 ± 14  |
| 7-MG:MG:N ... 7-MG:NH:H ... Gly863:O                        |  | 154 ± 10  |
| <b>PARP-2</b>                                               |  |           |
| <b>Distance, Å</b>                                          |  |           |
| 7-MG:CO:O ... Gly429:H                                      |  | 2.1 ± 0.3 |
| 7-MG:CO:O ... Ser470:OG:HG                                  |  | 1.9 ± 0.3 |
| 7-MG:NH:H ... Gly429:O                                      |  | 1.9 ± 0.1 |
| 7-MG:CH <sub>3</sub> :C ... Ala464:CB                       |  | 3.9 ± 0.3 |
| C(7-MG fused rings) ... C(Tyr473 benzene ring)              |  | 3.6 ± 0.2 |
| <b>Angle, deg</b>                                           |  |           |
| 7-MG:CO:O ... Gly429:H ... Gly429:N                         |  | 158 ± 13  |
| 7-MG:CO:O ... Ser470:OG:HG ... Ser470:OG                    |  | 157 ± 16  |
| 7-MG:NH:H ... 7-MG:NH:H ... Gly428:O                        |  | 153 ± 10  |
| <b>PARP-3</b>                                               |  |           |
| <b>Distance, Å</b>                                          |  |           |
| 7-MG:CO:O ... Gly385:H                                      |  | 2.2 ± 0.3 |
| 7-MG:CO:O ... Ser422:OG:HG                                  |  | 2.1 ± 0.7 |
| 7-MG:NH:H ... Gly385:O                                      |  | 1.9 ± 0.1 |
| 7-MG:CH <sub>3</sub> :C ... Ala416:CB                       |  | 3.8 ± 0.3 |
| C(7-MG fused rings) ... C(Tyr425 benzene ring)              |  | 3.6 ± 0.2 |
| <b>Angle, deg</b>                                           |  |           |
| 7-MG:CO:O ... Gly385:H ... Gly385:N                         |  | 148 ± 17  |
| 7-MG:CO:O ... Ser422:OG:HG ... Ser422:OG                    |  | 158 ± 25  |
| 7-MG:NH:H ... 7-MG:NH:H ... Gly385:O                        |  | 153 ± 11  |
| <b>PARP-5a, D-loop conformation I</b>                       |  |           |
| <b>Distance, Å</b>                                          |  |           |
| 7-MG:CO:O ... Gly1185:H                                     |  | 2.2 ± 0.2 |
| 7-MG:CO:O ... Ser1221:OG:HG                                 |  | 2.3 ± 1.0 |
| 7-MG:NH:H ... Gly1185:O                                     |  | 1.9 ± 0.1 |
| 7-MG:CH <sub>3</sub> :C ... Ala1215:CB                      |  | 3.9 ± 0.3 |
| C(7-MG fused rings) ... C(Tyr1224 benzene ring)             |  | 3.6 ± 0.2 |
| <b>Angle, deg</b>                                           |  |           |
| 7-MG:CO:O ... Gly1185:H ... Gly1185:N                       |  | 161 ± 11  |
| 7-MG:CO:O ... Ser1221:OG:HG ... Ser1221:OG                  |  | 148 ± 33  |
| 7-MG:NH:H ... 7-MG:NH:H ... Gly1185:O                       |  | 148 ± 12  |
| <b>PARP-5a, D-loop conformation II</b>                      |  |           |
| <b>Distance, Å</b>                                          |  |           |
| 7-MG:CO:O ... Gly1185:H                                     |  | 2.1 ± 0.2 |
| 7-MG:CO:O ... Ser1221:OG:HG                                 |  | 2.1 ± 0.4 |
| 7-MG:NH:H ... Gly1185:O                                     |  | 1.9 ± 0.1 |
| 7-MG:CH <sub>3</sub> :C ... Ala1215:CB                      |  | 3.7 ± 0.2 |
| C(7-MG fused rings) ... C(Tyr1224 benzene ring)             |  | 3.7 ± 0.3 |
| <b>Angle, deg</b>                                           |  |           |
| 7-MG:CO:O ... Gly1185:H ... Gly1185:N                       |  | 159 ± 12  |
| 7-MG:CO:O ... Ser1221:OG:HG ... Ser1221:OG                  |  | 154 ± 20  |
| 7-MG:NH:H ... 7-MG:NH:H ... Gly1185:O                       |  | 150 ± 12  |
| <b>PARP-5b</b>                                              |  |           |

| <b>Distance, Å</b>                              |  |           |
|-------------------------------------------------|--|-----------|
| 7-MG:CO:O ... Gly1032:H                         |  | 2.1 ± 0.2 |
| 7-MG:CO:O ... Ser1068:OG:HG                     |  | 2.3 ± 0.5 |
| 7-MG:NH:H ... Gly1032:O                         |  | 1.9 ± 0.1 |
| 7-MG:CH3:C ... Ala1062:CB                       |  | 3.8 ± 0.3 |
| C(7-MG fused rings) ... C(Tyr1071 benzene ring) |  | 3.6 ± 0.2 |
| <b>Angle, deg</b>                               |  |           |
| 7-MG:CO:O ... Gly1032:H ... Gly1032:N           |  | 155 ± 13  |
| 7-MG:CO:O ... Ser1068:OG:HG ... Ser1068:OG      |  | 148 ± 24  |
| 7-MG:NH:N ... 7-MG:NH:H ... Gly1032:O           |  | 149 ± 12  |
| <b>PARP-10</b>                                  |  |           |
| <b>Distance, Å</b>                              |  |           |
| 7-MG:CO:O ... Gly888:H                          |  | 1.9 ± 0.1 |
| 7-MG:CO:O ... Ser927:OG:HG                      |  | 2.0 ± 0.3 |
| 7-MG:NH:H ... Gly888:O                          |  | 2.1 ± 0.2 |
| 7-MG:CH3:C ... Ala921:CB                        |  | 4.2 ± 0.4 |
| C(7-MG fused rings) ... C(Tyr932 benzene ring)  |  | 4.0 ± 0.3 |
| <b>Angle, deg</b>                               |  |           |
| 7-MG:CO:O ... Gly888:H ... Gly888:N             |  | 162 ± 9   |
| 7-MG:CO:O ... Ser927:OG:HG ... Ser927:OG        |  | 160 ± 13  |
| 7-MG:NH:N ... 7-MG:NH:H ... Gly888:O            |  | 146 ± 10  |
| <b>PARP-12</b>                                  |  |           |
| <b>Distance, Å</b>                              |  |           |
| 7-MG:CO:O ... Gly565:H                          |  | 1.9 ± 0.2 |
| 7-MG:CO:O ... Ser604:OG:HG                      |  | 3.2 ± 1.5 |
| 7-MG:NH:H ... Gly565:O                          |  | 2.1 ± 0.2 |
| 7-MG:CH3:C ... Ala598:CB                        |  | 4.1 ± 0.4 |
| C(7-MG fused rings) ... C(Tyr607 benzene ring)  |  | 3.7 ± 0.2 |
| <b>Angle, deg</b>                               |  |           |
| 7-MG:CO:O ... Gly565:H ... Gly565:N             |  | 160 ± 11  |
| 7-MG:CO:O ... Ser604:OG:HG ... Ser604:OG        |  | 111 ± 62  |
| 7-MG:NH:N ... 7-MG:NH:H ... Gly565:O            |  | 147 ± 12  |
| <b>PARP-13</b>                                  |  |           |
| <b>Distance, Å</b>                              |  |           |
| 7-MG:CO:O ... Ala788:H                          |  | 2.6 ± 0.5 |
| 7-MG:CO:O ... Ser827:OG:HG                      |  | 1.9 ± 0.5 |
| 7-MG:NH:H ... Ala788:O                          |  | 2.0 ± 0.2 |
| 7-MG:CH3:C ... Ala821:CB                        |  | 3.9 ± 0.3 |
| <b>Angle, deg</b>                               |  |           |
| 7-MG:CO:O ... Ala788:H ... Ala788:N             |  | 148 ± 16  |
| 7-MG:CO:O ... Ser827:OG:HG ... Ser827:OG        |  | 158 ± 22  |
| 7-MG:NH:N ... 7-MG:NH:H ... Ala788:O            |  | 149 ± 10  |
| <b>PARP-14</b>                                  |  |           |
| <b>Distance, Å</b>                              |  |           |
| 7-MG:CO:O ... Gly1602:H                         |  | 1.9 ± 0.1 |
| 7-MG:CO:O ... Ser1641:OG:HG                     |  | 2.0 ± 0.4 |
| 7-MG:NH:H ... Gly1602:O                         |  | 2.6 ± 0.6 |
| 7-MG:CH3:C ... Ala1635:CB                       |  | 4.1 ± 0.4 |
| C(7-MG fused rings) ... C(Tyr1646 benzene ring) |  | 4.0 ± 0.4 |
| <b>Angle, deg</b>                               |  |           |
| 7-MG:CO:O ... Gly1602:H ... Gly1602:N           |  | 163 ± 10  |
| 7-MG:CO:O ... Ser1641:OG:HG ... Ser1641:OG      |  | 160 ± 17  |
| 7-MG:NH:N ... 7-MG:NH:H ... Gly1602:O           |  | 150 ± 12  |
| <b>PARP-15</b>                                  |  |           |
| <b>Distance, Å</b>                              |  |           |
| 7-MG:CO:O ... Gly538:H                          |  | 1.9 ± 0.1 |
| 7-MG:CO:O ... Ser577:OG:HG                      |  | 2.4 ± 1.2 |
| 7-MG:NH:H ... Gly538:O                          |  | 2.1 ± 0.2 |

|                                                |           |
|------------------------------------------------|-----------|
| 7-MG:CH3:C ... Ala571:CB                       | 4.7 ± 0.5 |
| C(7-MG fused rings) ... C(Tyr582 benzene ring) | 4.5 ± 0.4 |
| <b>Angle, deg</b>                              |           |
| 7-MG:CO:O ... Gly538:H ... Gly538:N            | 158 ± 11  |
| 7-MG:CO:O ... Ser577:OG:HG ... Ser577:OG       | 141 ± 45  |
| 7-MG:NH:N ... 7-MG:NH:H ... Gly538:O           | 150 ± 11  |
| <b>PARP-16</b>                                 |           |
| <b>Distance, Å</b>                             |           |
| 7-MG:CO:O ... Gly153:H                         | 2.0 ± 0.2 |
| 7-MG:NH:H ... Gly153:O                         | 1.9 ± 0.1 |
| 7-MG:CH3:C ... Thr184:CG2                      | 3.8 ± 0.3 |
| C(7-MG fused rings) ... C(Tyr193 benzene ring) | 3.6 ± 0.2 |
| <b>Angle, deg</b>                              |           |
| 7-MG:CO:O ... Gly153:H ... Gly153:N            | 163 ± 9   |
| 7-MG:NH:N ... 7-MG:NH:H ... Gly153:O           | 151 ± 10  |

<sup>1</sup> Distance between the geometric center of 7-MG fused rings and the center of the Tyr benzene ring.

**Table S3.** Activity of PARP-1 and PARP-5b (tankyrase 2) at 7-MG concentration of 360 μM determined with an immunochemical assay, as described previously (Berishvili, V.P.; Kuimov, A.N.; et al. *Molecules*. **2020**, *25*, 3171). Mean values are presented with standard deviations.

| PARP      | Residual Activity % |
|-----------|---------------------|
| <b>1</b>  | 14 ± 1              |
| <b>5b</b> | 54 ± 5              |

**Table S4.** PARPs of unknown structure and their close homologues.

| PARP      | Homologues           | PDB Templates <sup>1</sup> |
|-----------|----------------------|----------------------------|
| <b>4</b>  | PARPs 1, 2, 3        | 4zzz, 4zzx, 4l7n           |
| <b>6</b>  | PARPs 1, 2, 3, 16    | 4zzz, 4zzx, 4l7n, 6hxs     |
| <b>7</b>  | PARPs 10, 12, 14     | 3hkv, 2pqf, 3smj           |
| <b>8</b>  | PARPs 1, 2, 3, 16    | 4zzz, 4zzx, 4l7n, 6hxs     |
| <b>9</b>  | PARPs 10, 12, 15     | 3hkv, 2pqf, 6ek3           |
| <b>11</b> | PARPs 10, 12, 14, 15 | 3hkv, 2pqf, 3smj, 6ek3     |

<sup>1</sup> Template structures used in homology modeling.

**Table S5.** Interactions between a probe inhibitor (7-MG) and NA site residues in PARPs 4, 6–9, and 11 revealed using homology modeling.

|                                                |     |
|------------------------------------------------|-----|
| <b>PARP-4</b>                                  |     |
| <b>Distance, Å</b>                             |     |
| 7-MG:CO:O ... Gly439:H                         | 1.9 |
| 7-MG:CO:O ... Ser485:OG:HG                     | 1.8 |
| 7-MG:NH:H ... Gly439:O                         | 1.8 |
| 7-MG:CH3:C ... Ser479:CB                       | 3.6 |
| C(7-MG fused rings) ... C(Tyr488 benzene ring) | 3.9 |
| <b>PARP-6</b>                                  |     |
| <b>Distance, Å</b>                             |     |
| 7-MG:CO:O ... Gly474:H                         | 2.0 |
| 7-MG:CO:O ... Ser516:OG:HG                     | 1.8 |
| 7-MG:NH:H ... Gly474:O                         | 1.8 |
| 7-MG:CH3:C ... Ser510:CB                       | 3.5 |
| C(7-MG fused rings) ... C(Tyr519 benzene ring) | 3.4 |
| <b>PARP-7</b>                                  |     |
| <b>Distance, Å</b>                             |     |
| 7-MG:CO:O ... Gly533:H                         | 1.9 |
| 7-MG:CO:O ... Ser572:OG:HG                     | 1.8 |

|                                                |     |
|------------------------------------------------|-----|
| 7-MG:NH:H ... Gly533:O                         | 1.9 |
| 7-MG:CH3:C ... Ala566:CB                       | 3.8 |
| C(7-MG fused rings) ... C(Phe575 benzene ring) | 3.5 |
| <b>PARP-8</b>                                  |     |
| <b>Distance, Å</b>                             |     |
| 7-MG:CO:O ... Gly698:H                         | 2.0 |
| 7-MG:CO:O ... Ser740:OG:HG                     | 1.8 |
| 7-MG:NH:H ... Gly698:O                         | 1.8 |
| 7-MG:CH3:C ... Ser734:CB                       | 3.5 |
| C(7-MG fused rings) ... C(Tyr743 benzene ring) | 3.4 |
| <b>PARP-9</b>                                  |     |
| <b>Distance, Å</b>                             |     |
| 7-MG:CO:O ... Gln706:H                         | 1.9 |
| 7-MG:NH:H ... Gln706:O                         | 1.8 |
| 7-MG:CH3:C ... Thr739:CB                       | 4.2 |
| <b>PARP-11</b>                                 |     |
| <b>Distance, Å</b>                             |     |
| 7-MG:CO:O ... Gly205:H                         | 1.9 |
| 7-MG:CO:O ... Ser244:OG:HG                     | 1.8 |
| 7-MG:NH:H ... Gly205:O                         | 1.9 |
| 7-MG:CH3:C ... Ala238:CB                       | 3.7 |
| C(7-MG fused rings) ... C(Phe247 benzene ring) | 3.6 |

<sup>1</sup> Distance between the geometric center of 7-MG fused rings and the center of the Tyr/Phe benzene ring.

**Table S6.** Missing residues in representative PARP structures, whose coordinates were predicted or transferred from other PDB structures.

| PARP | Representative Structure | Missing Residues                 |
|------|--------------------------|----------------------------------|
| 1    | 4zzz                     | 784–786 (transferred from 5ws1)  |
| 2    | 4zzx                     | 549, 550 (transferred from 3kjd) |
| 3    | 4gv2                     | 242–244 (transferred from 3c4h)  |
| 5a   | 4w6e <sup>1</sup>        | 1285 (transferred from 4uw1)     |
| 12   | 2pqf                     | 644, 645 (predicted)             |
| 16   | 4f0d                     | 171, 172, 223–252 (predicted)    |

<sup>1</sup> D-loop conformation I.

**Table S7.** Control data used for energy minimization and MD simulation of the PARP-7-MG complexes. For more information see the Amber Users' Manual.

| Energy Minimization, Stage 1                                                                                                                                                                                                                                                                                                    | Energy Minimization, Stage 2                                                                                                                                                                                                              |
|---------------------------------------------------------------------------------------------------------------------------------------------------------------------------------------------------------------------------------------------------------------------------------------------------------------------------------|-------------------------------------------------------------------------------------------------------------------------------------------------------------------------------------------------------------------------------------------|
| <pre>&amp;cntrl imin=1, maxcyc=5000, ncyc=2500, cut=10.0, ntb=1, ntc=1, ntf=1, ntpr=10, ntr=1, restraintmask=':1-354 &amp; !@H=', restraint_wt=2.0 /</pre>                                                                                                                                                                      | <pre>&amp;cntrl imin=1, maxcyc=10000, ncyc=5000, cut=10.0, ntb=1, ntc=1, ntf=1, ntpr=10 /</pre>                                                                                                                                           |
| MD simulation, heating                                                                                                                                                                                                                                                                                                          | MD simulation, equilibration                                                                                                                                                                                                              |
| <pre>&amp;cntrl imin=0, irect=0, ntx=1, nstlim=25000, dt=0.002, ntc=2, ntf=2, cut=10.0, ntb=1, ntpr=500, ntwx=500, ntt=3, gamma_ln=2.0, tempi=0.0, temp0=300.0, ntr=1, restraintmask=':1-354', restraint_wt=1.0, nmropt=1 / &amp;wt TYPE='TEMP0', istep1=0, istep2=25000, value1=0.1, value2=300.0 / &amp;wt TYPE='END' /</pre> | <pre>&amp;cntrl imin=0, irect=1, ntx=5, nstlim=250000, (to run 10 ns simulation, set nstlim=5000000) dt=0.002, ntc=2, ntf=2, cut=10.0, ntb=2, ntp=1, taup=2.0, ntpr=1000, ntwx=1000, ntwr=50000, ntt=3, gamma_ln=2.0, temp0=300.0 /</pre> |
